# Supplementary material for: Hercynite silica sulfuric acid: a novel inorganic sulfurous solid acid catalyst for one-pot cascade organic transformations
Source: Royal Society of Chemistry journal article supplement (doi:10.1039/d2ra03481f), 2022-01-01
Supplement: d2ra03481f1.pdf [file d2ra03481f1.pdf]

## Supplementary Materials

# Hercynite Silica Sulfuric Acid: A Novel Inorganic Sulfurous Solid Acid Catalyst for One-Pot Cascade Organic Transformations

Masoud Mohammadi<sup>a</sup>, Arash Ghorbani-Choghamarani<sup>\*.b</sup>

<sup>a</sup>Department of Chemistry, Faculty of Science, Ilam University, P.O. Box 69315516, Ilam, Iran.

<sup>b</sup>Department of Organic Chemistry, Faculty of Chemistry, Bu–Ali Sina University, Hamedan, 6517838683, Iran.

\*Email: [a.ghorbani@basu.ac.ir](mailto:a.ghorbani@basu.ac.ir) or [arashghch58@yahoo.com](mailto:arashghch58@yahoo.com)

### Abstract

Herein, we delineated the synthesis of a novel inorganic sulfurous magnetic solid acid catalyst by the immobilization of extremely high content of sulfuric acid functionalities on the amorphous silica-modified Hercynite nanomagnetic core-shell via a simple method. Silica sulfuric acid (SSA) modified Hercynite nanocomposite (Hercynite@SSA) combines excellent recoverability and stability characteristics of Hercynite (which can be regarded as a ferro spinel with  $Fd3m$  space group and cubic crystal structure) with the strong Brønsted acid properties of  $-SO_3H$  groups. This nanomagnetic solid acid was found to be an efficient and facile strong solid acid catalyst for the synthesis of bis (pyrazolyl) methanes via two different one-pot multicomponent methodologies under green conditions. The Hercynite@SSA catalyst shows excellent catalytic activity and reusability in the ethanolic medium among different solid acid materials. A plausible reaction mechanism is proposed for this synthesis.

**Keywords:** Inorganic Bronsted Acid; Hercynite@SSA; Heterogeneous catalyst; Solid acid catalyst, Bis (pyrazolyl) methanes;

### Experimental Section

#### 2. Experimental Section

## Supplementary Materials

### *Materials and methods*

Chemicals such as  $\text{FeCl}_2 \cdot 4\text{H}_2\text{O}$ ,  $\text{Al}(\text{NO}_3)_3 \cdot 9\text{H}_2\text{O}$ , NaOH, tetraethyl orthosilicate (TEOS), chlorosulfonic acid, phenylhydrazine, ethyl acetoacetat, 3-methyl,1-phenyl-H1-pyrazole-5-ol, aldehydes, PEG-400, ethanol, dichloromethane, acetonitrile, methanol, dimethylformamide, acetonitrile and dimethyl sulfoxide were purchased from Merck and Aldrich chemical companies and used as received. The products were characterized by comparison of their spectral data, TLC and physical data.

### **Typical Procedure for Hercynite@SSA Preparation**

A convenient and inexpensive stepwise procedure was used to prepare Hercynite silica sulfuric acid magnetic nanocomposite. In the first step, Hercynite MNPs were prepared via the typical coprecipitation method, as reported by our group <sup>43</sup>. Afterward, the surface of Hercynite was modified using a silica shell according to the Stöber method <sup>44</sup>. Subsequently, 1 g of the obtained Hercynite@SiO<sub>2</sub> MNPs was dispersed in 50 mL of dry dichloromethane by sonication for 30 min. Thereafter, the solution was stirred in an ice bath for one hour and, then, 1.5 mL of chlorosulfuric acid reagent was added dropwise and stirred for 4 h at room temperature to ensure the complete consumption of the surface hydroxyl groups and assist the sulfuric acid immobilization. After completion of the reaction (when the release of HCL gas from the reaction vessel was stopped), The reaction mixture was separated using magnetic decantation and, then, washed thrice with dry dichloromethane. The obtained Hercynite@SSA MNPs were then dried at room temperature (Scheme 1).

## Supplementary Materials

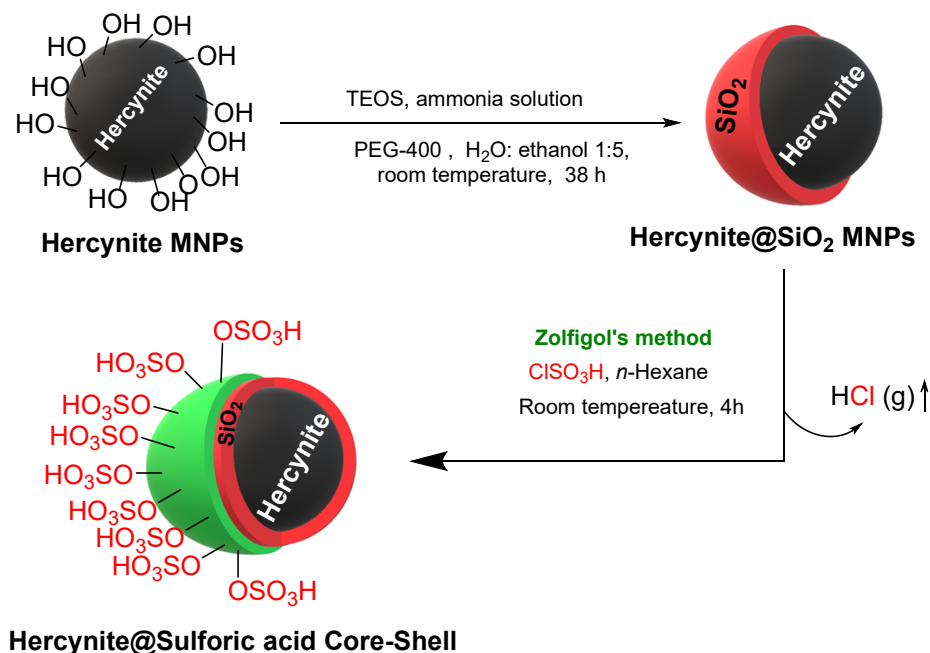

Scheme 1. Stepwise synthesis of Hercynite@SSA.

### General Procedures for the Synthesis of bis (pyrazolyl) methanes

In a general reaction, 15 mg of Hercynite@SSA catalyst was added to a 5 ml ethanol solution of aryl aldehydes (1 mmol) and i) commercial 3-methyl,1-phenyl-H1-pyrazole-5-ol (2 mmol) (Pseudo-three-component, scheme 2a) or ii) synthetic mixture of phenylhydrazine (2 mmol) ethyl acetoacetate (2 mmol) (Pseudo-five-component, scheme2b) in 10 mL round bottom flask and, then, the resulting solution was stirred for the appropriate time at reflux conditions (80 °C). After completion of the reaction (probed by TLC), the Hercynite@SSA MNPs were separated from the boiling mixture using magnetic decantation. The precipitated bis(pyrazolyl) methanes were purified by recrystallization in ethanol thrice (Scheme 4). The isolated pure products, known in the literature, were authenticated by their corresponding melting points and also the performed <sup>1</sup>H-NMR spectroscopies.

## Supplementary Materials

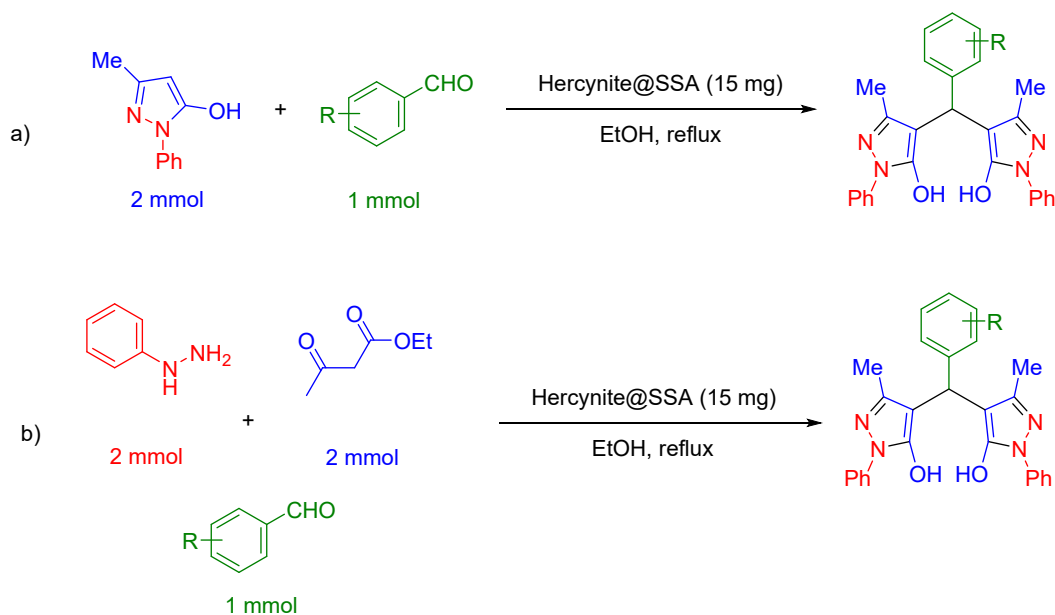

**Scheme 2.** The a) pseudo-three-component and b) pseudo-five-component synthesis of bis (pyrazolyl)methanes catalyzed by Hercynite@SSA.

## Selected Spectral data

### 4,4'-(Thiophen-2-ylmethylene)bis(3-methyl-1-phenyl-1Hpyrazol-5-ol):

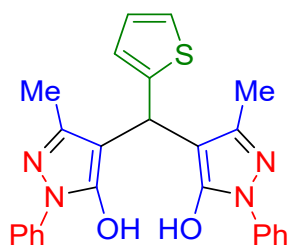

$^1\text{H}$  NMR (400 MHz, DMSO- $d_6$ )  $\delta$  14.01 (s, 1H), 12.51 (s, 1H), 7.71 (d,  $J$  = 8.0 Hz, 4H), 7.45 (t,  $J$  = 7.8 Hz, 4H), 7.31 – 7.23 (m, 3H), 6.91 (dd,  $J$  = 5.1, 3.5 Hz, 1H), 6.78 – 6.73 (m, 1H), 5.14 (s, 1H), 2.32 (s, 6H) ppm.

### 4,4'-((4-methylphenyl)methylene)bis(3-methyl-1-phenyl-1H-pyrazol-5-ol):

## Supplementary Materials

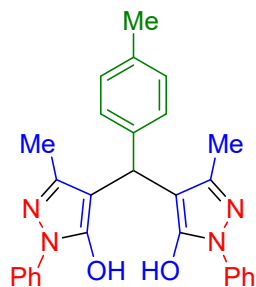

$^1\text{H}$  NMR (400 MHz, DMSO- $d_6$ )  $\delta$  13.94 (s, 1H), 12.44 (s, 1H), 7.71 (d,  $J$  = 7.9 Hz, 4H), 7.45 (t,  $J$  = 7.8 Hz, 4H), 7.25 (t,  $J$  = 7.6 Hz, 2H), 7.15 – 7.07 (m, 4H), 4.92 (s, 1H), 2.32 (s, 6H), 2.25 (s, 3H).

### 4,4'-(4-chlorophenylene)-bis(3-methyl-1-phenyl-1H-pyrazol-5-ol):

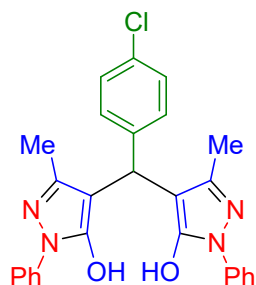

$^1\text{H}$  NMR (400 MHz, DMSO- $d_6$ )  $\delta$  13.89 (s, 1H), 12.53 (s, 1H), 7.70 (s, 4H), 7.45 (s, 4H), 7.34 (s, 2H), 7.26 (s, 4H), 4.98 (s, 1H), 2.33 (s, 6H).

### 4,4'-(phenylene)-bis(3-methyl-1-phenyl-1H-pyrazol-5-ol):

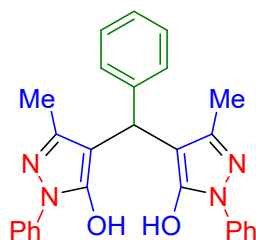

## Supplementary Materials

$^1\text{H}$  NMR (400 MHz, DMSO- $d_6$ )  $\delta$  13.94 (s, 1H), 12.42 (s, 1H), 7.71 (d,  $J = 8.0$  Hz, 4H), 7.44 (t,  $J = 7.8$  Hz, 4H), 7.25 (t,  $J = 7.6$  Hz, 2H), 7.16 (d,  $J = 8.3$  Hz, 2H), 6.84 (d,  $J = 8.2$  Hz, 3H), 4.90 (s, 1H), 2.31 (s, 6H).

# Supplementary Materials

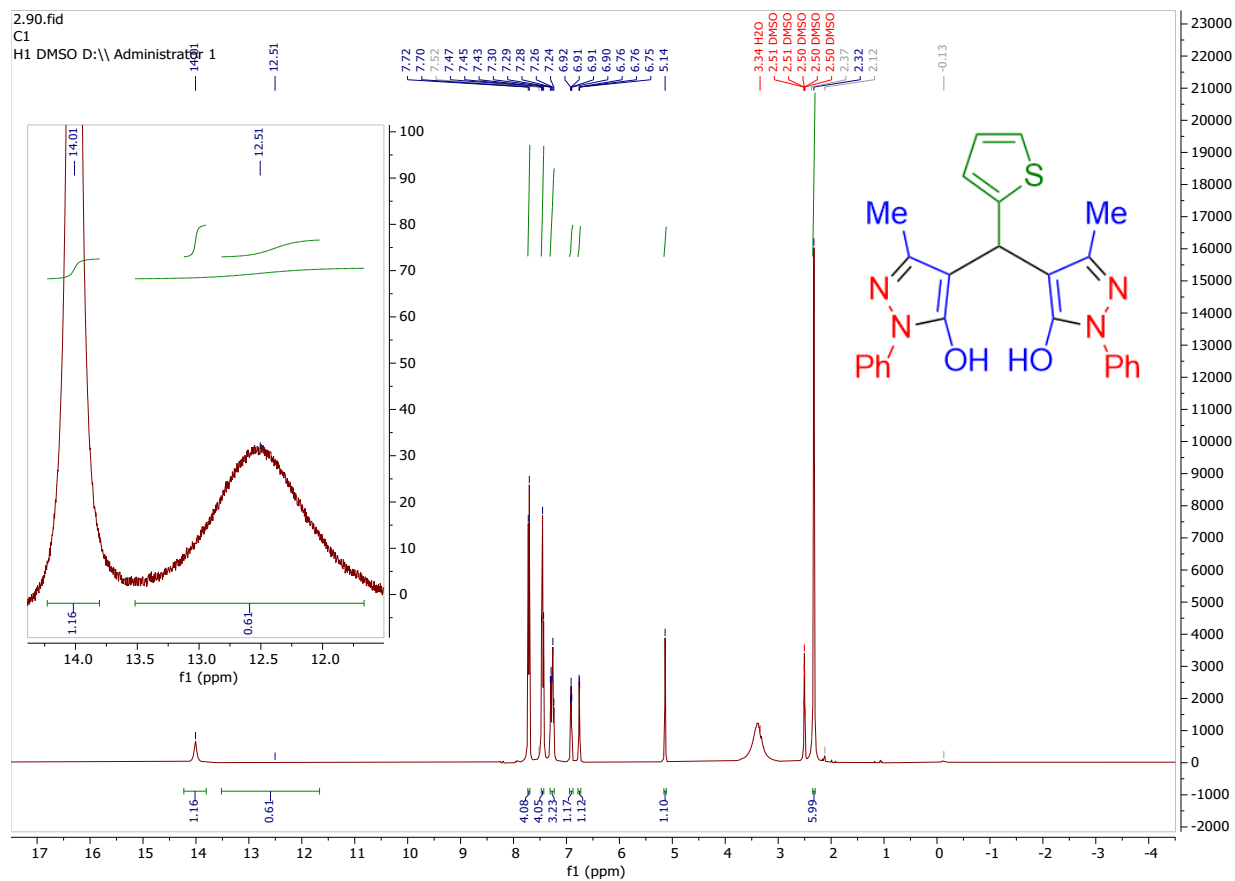

*S.1.*  $^1\text{H}$  NMR of 4,4'-(Thiophen-2-ylmethylene)bis(3-methyl-1-phenyl-1Hpyrazol-5-ol).

## Supplementary Materials

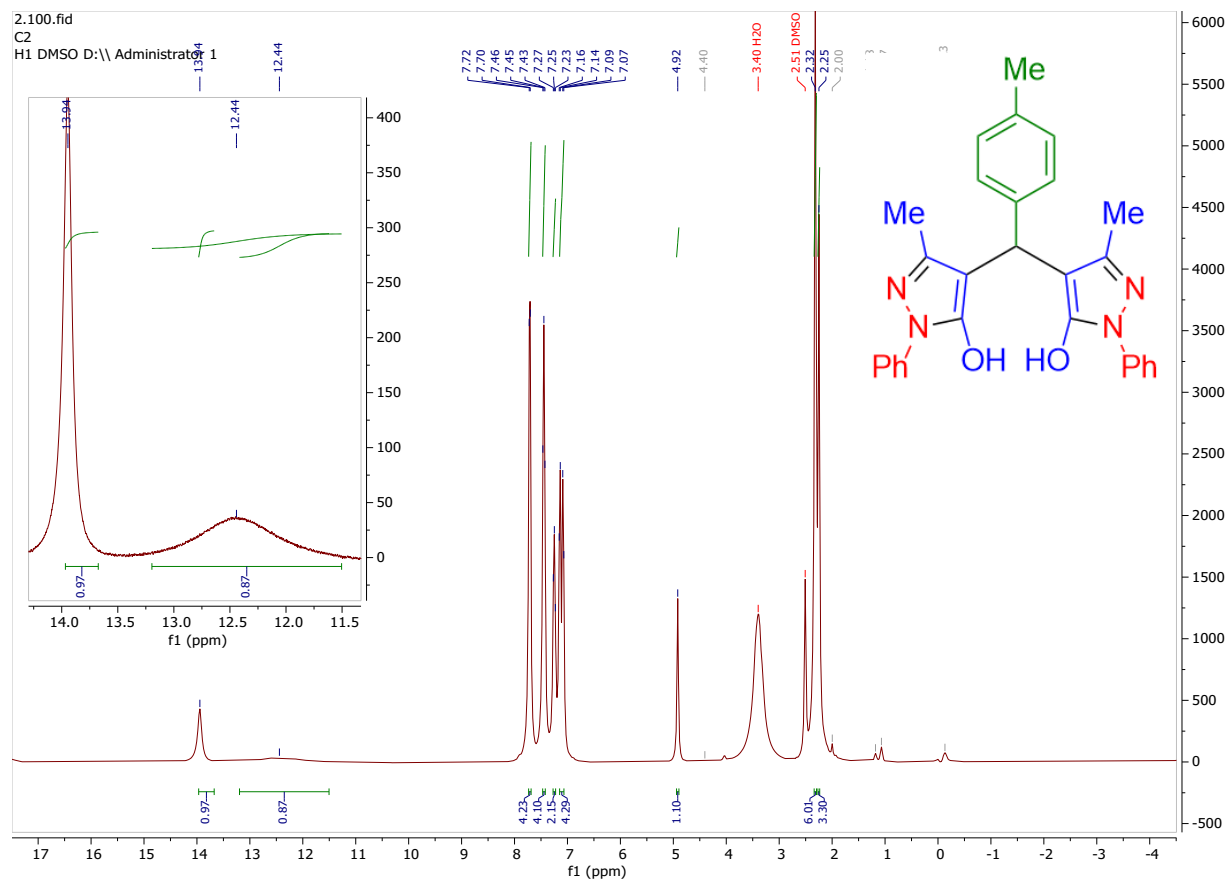

**S.2.**  $^1\text{H}$  NMR of 4,4'-((4-methylphenyl)methylene)bis(3-methyl-1-phenyl-1H-pyrazol-5-ol).



## Supplementary Materials

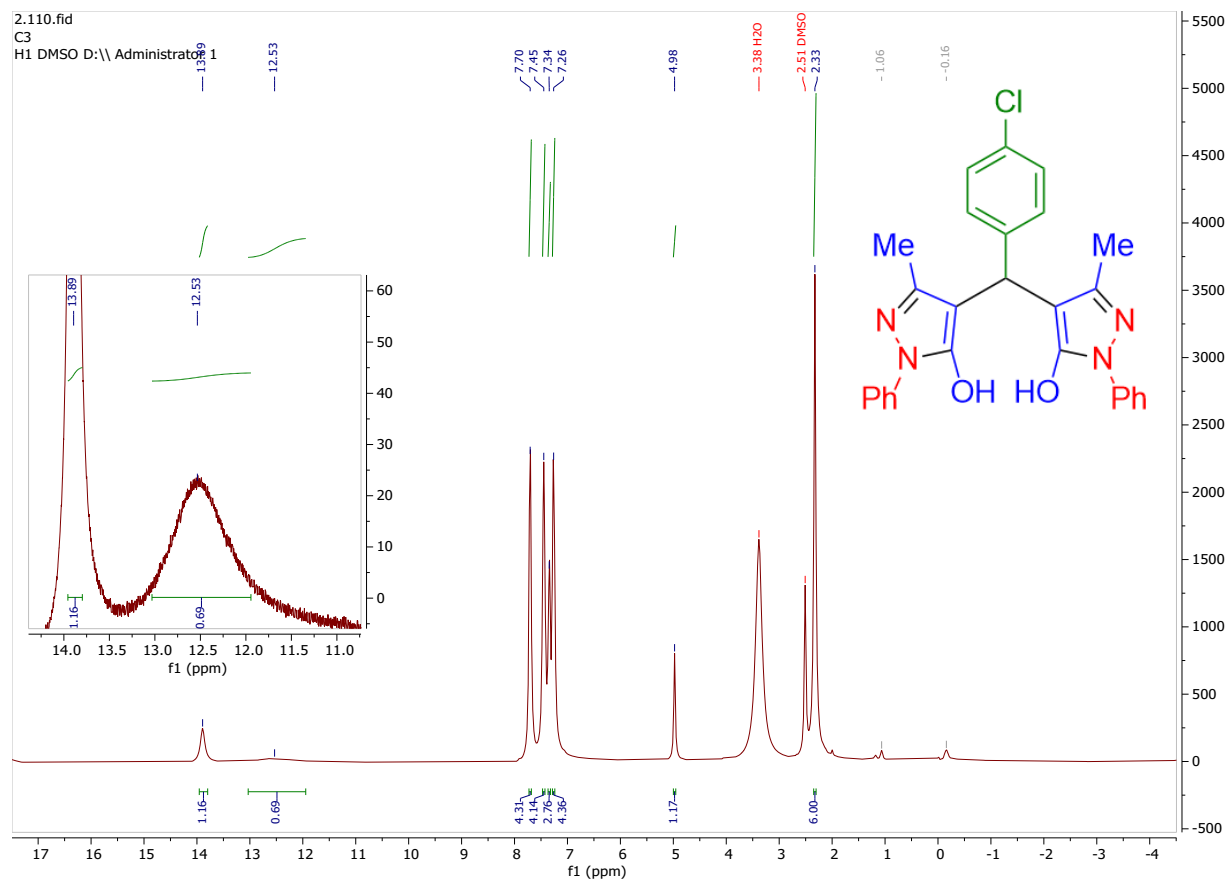

**S.3.**  $^1\text{H}$  NMR of 4,4'-(4-chlorophenylmethylene)-bis-(3-methyl-1-phenyl-1H-pyrazol-5-ol):

# Supplementary Materials

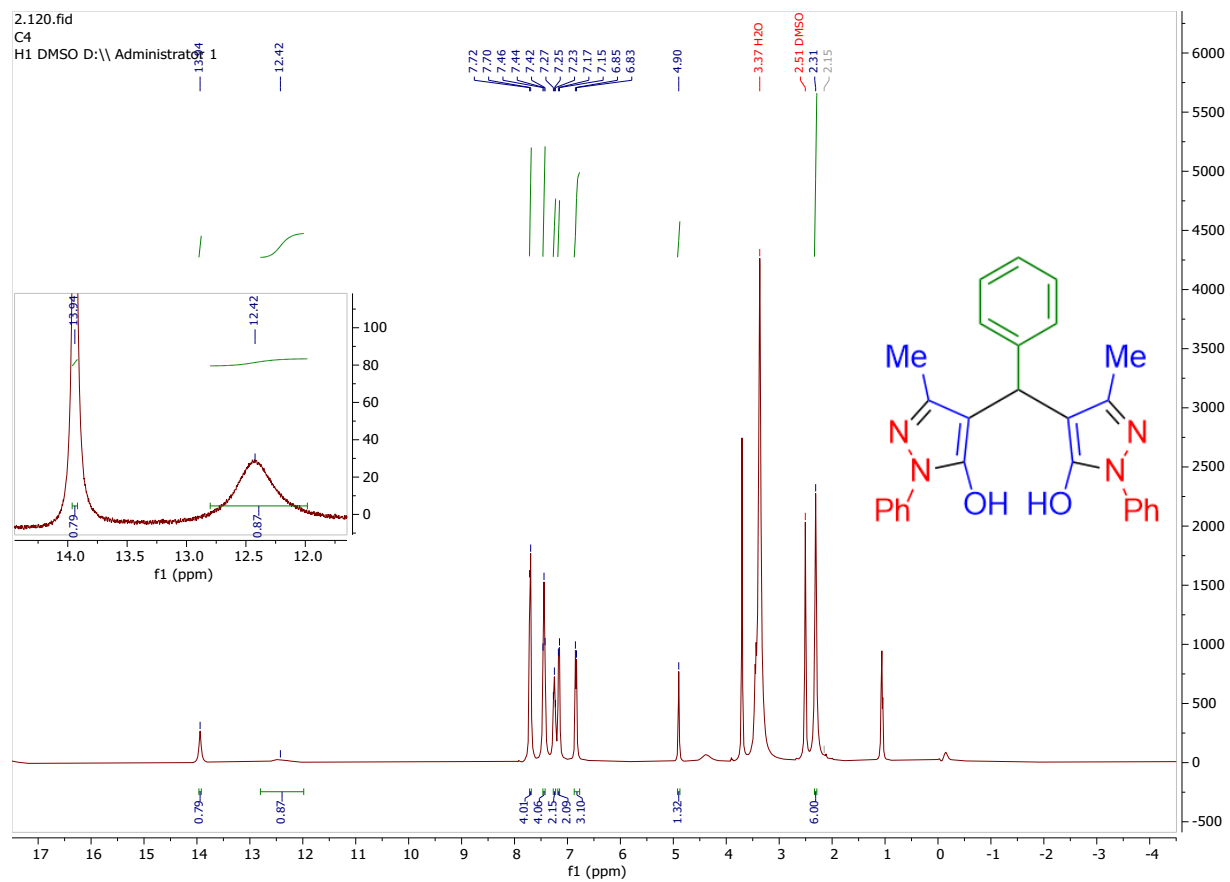

**S.4.**  $^1\text{H}$  NMR of 4,4'-(phenylmethylene)bis(3-methyl-1-phenyl-pyrazol-5-ol):
